# Supplementary material for: Improving the photocatalytic hydrogen production of SrTiO3byin situloading ethylene glycol as a co-catalyst
Source: Royal Society of Chemistry journal article supplement (doi:10.1039/d0qi00807a), 2020-01-01
Supplement: d0qi00807a1.pdf [file d0qi00807a1.pdf]

*Supporting information*

**Improving the photocatalytic hydrogen production of SrTiO<sub>3</sub> by in-situ loading  
ethylene glycol as co-catalyst**

Liuyang Zhu<sup>a</sup>, Wen Gu<sup>a</sup>, Jifang Chen<sup>a</sup>, Huan Liu<sup>a</sup>, Yingying Zhang<sup>a</sup>, Qingmei Wu<sup>a</sup>,  
Yuanxi Zhang<sup>a</sup>, Zhengping Fu<sup>a,c,\*</sup>, Yalin Lu<sup>a,b,c,\*</sup>

<sup>a</sup>CAS Key Laboratory of Materials for Energy Conversion, Department of Materials  
Science and Engineering, University of Science and Technology of China, Hefei  
230026, P. R. China

<sup>b</sup>National Synchrotron Radiation Laboratory, University of Science and Technology of  
China, Hefei 230026, P. R. China

<sup>c</sup>Synergetic Innovation Center of Quantum Information and Quantum Physics & Hefei  
National Laboratory for Physical Sciences at Microscale, University of Science and  
Technology of China, Hefei 230026, P. R. China

\* Correspondence: fuzp@ustc.edu.cn; yllu@ustc.edu.cn

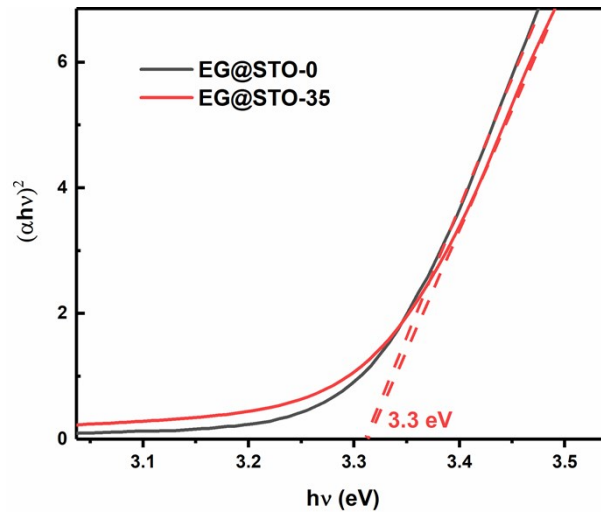

Figure S1. The relationship between  $(\alpha h\nu)^2$  and photon energy.

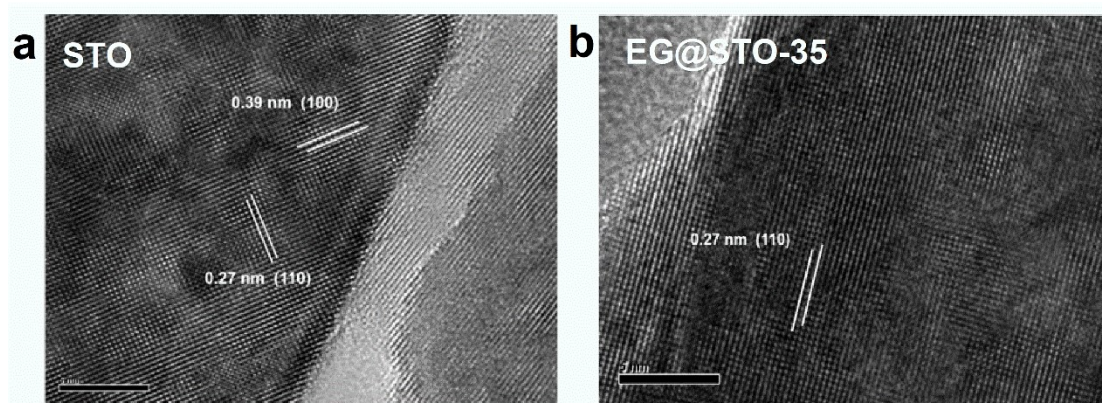

Figure S2. The HRTEM of pure STO and EG@STO-35.

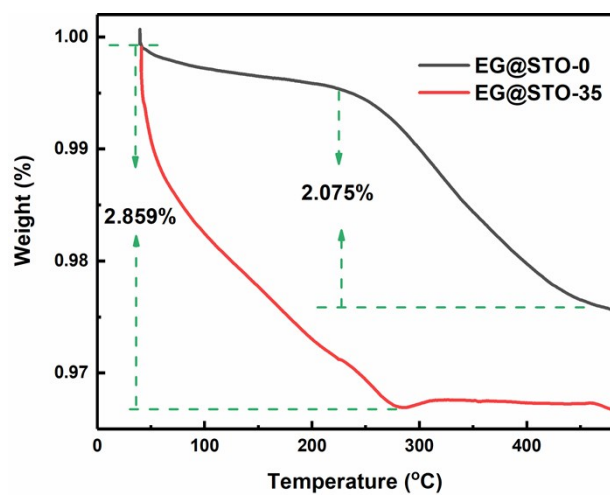

Figure S3. TG curve of the EG@STO-0 and EG@STO-35.

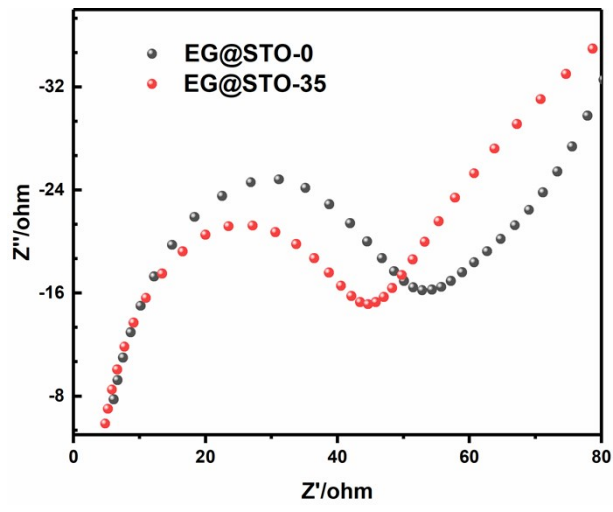

Figure S4. The EIS of EG@STO-0 and EG@STO-35.

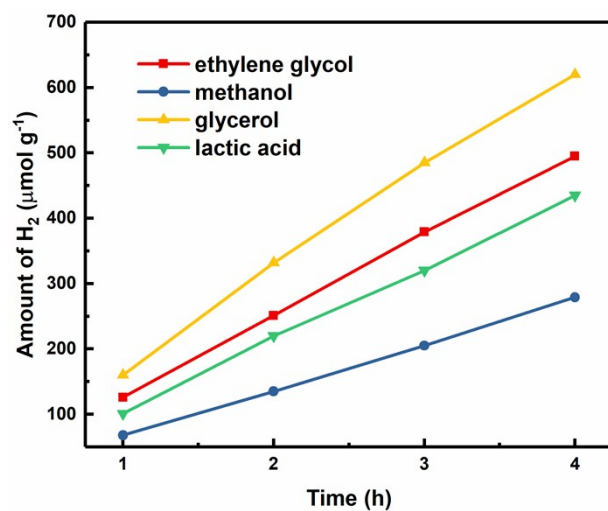

Figure S5. The hydrogen production effect of EG@STO-35 under different sacrificial agents.

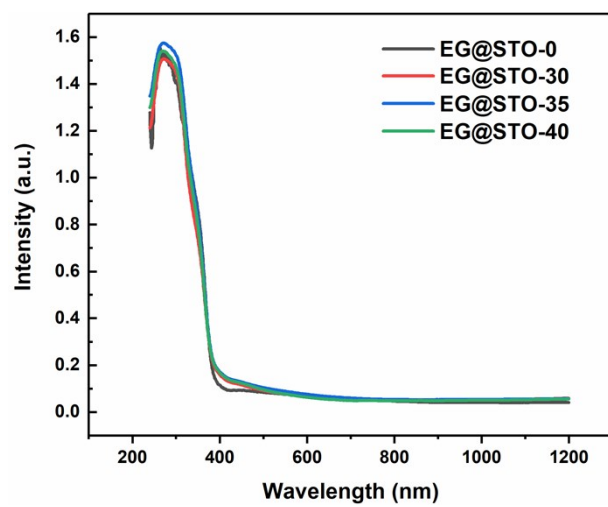

Figure S6. UV-vis absorbance spectra of EG@STO-x.

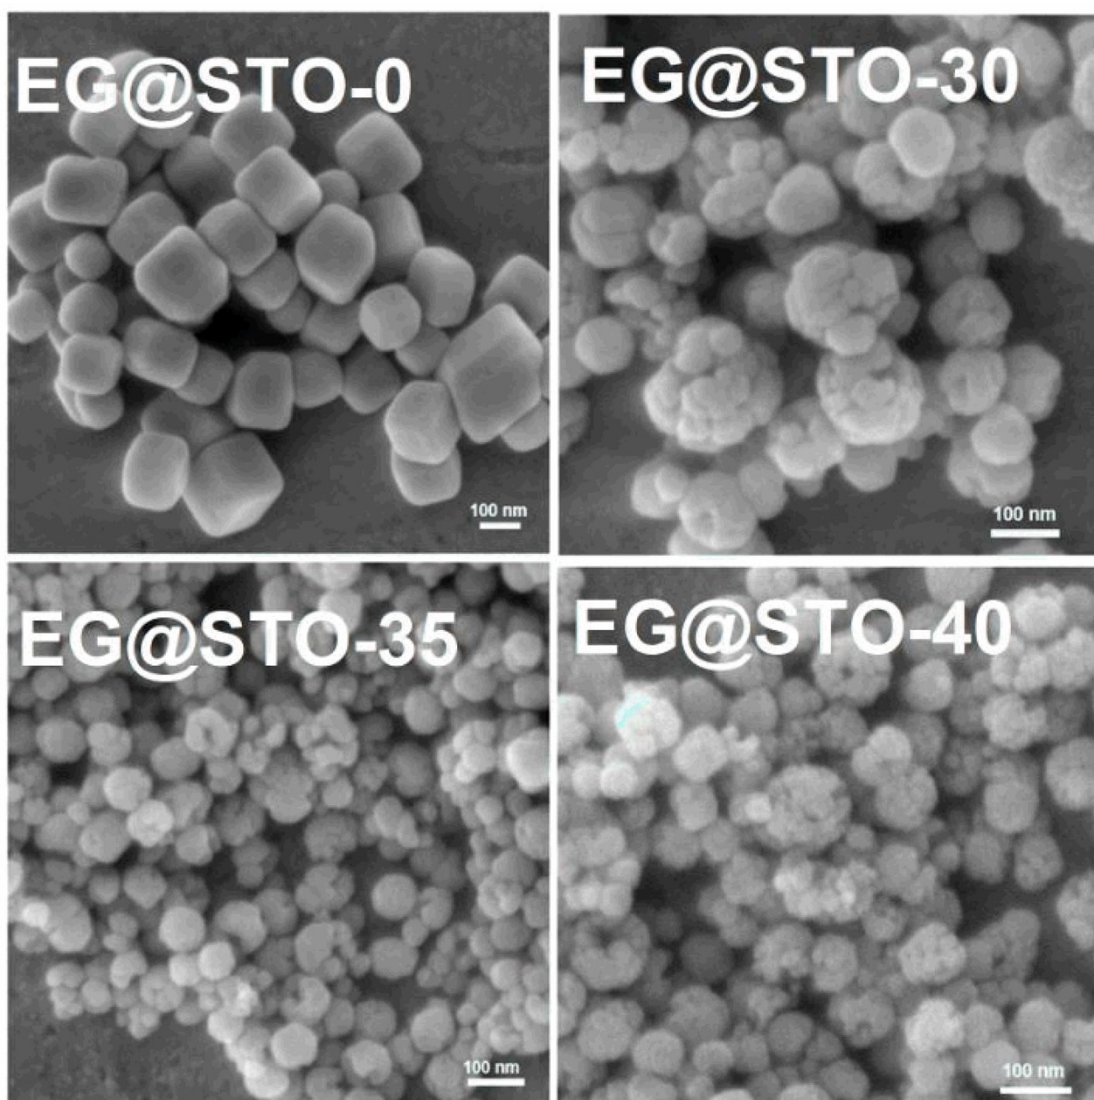

Figure S7. SEM of EG@STO-x.



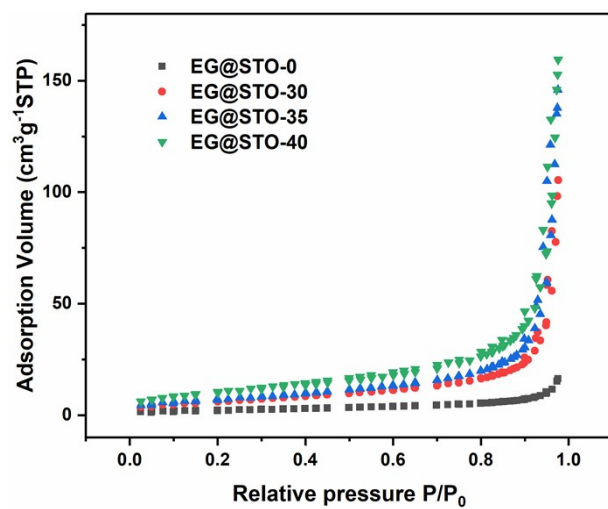

Figure S8. N<sub>2</sub> adsorption-desorption isotherms of EG@STO-x (x = 0, 30, 35, 40).

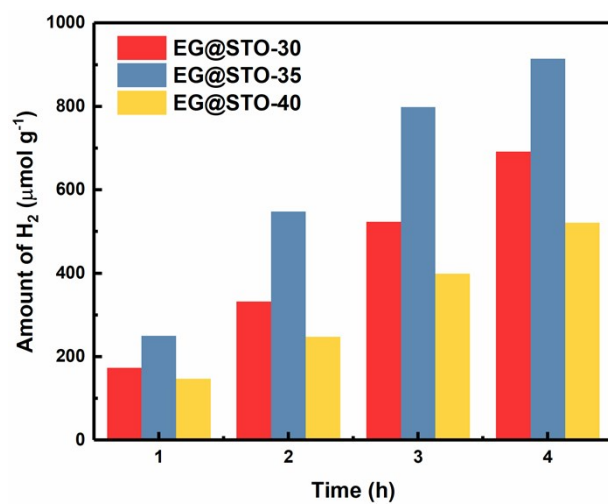

Figure S9. (a) photocatalytic hydrogen production performance of EG@STO-x (x = 0, 30, 35, 40).

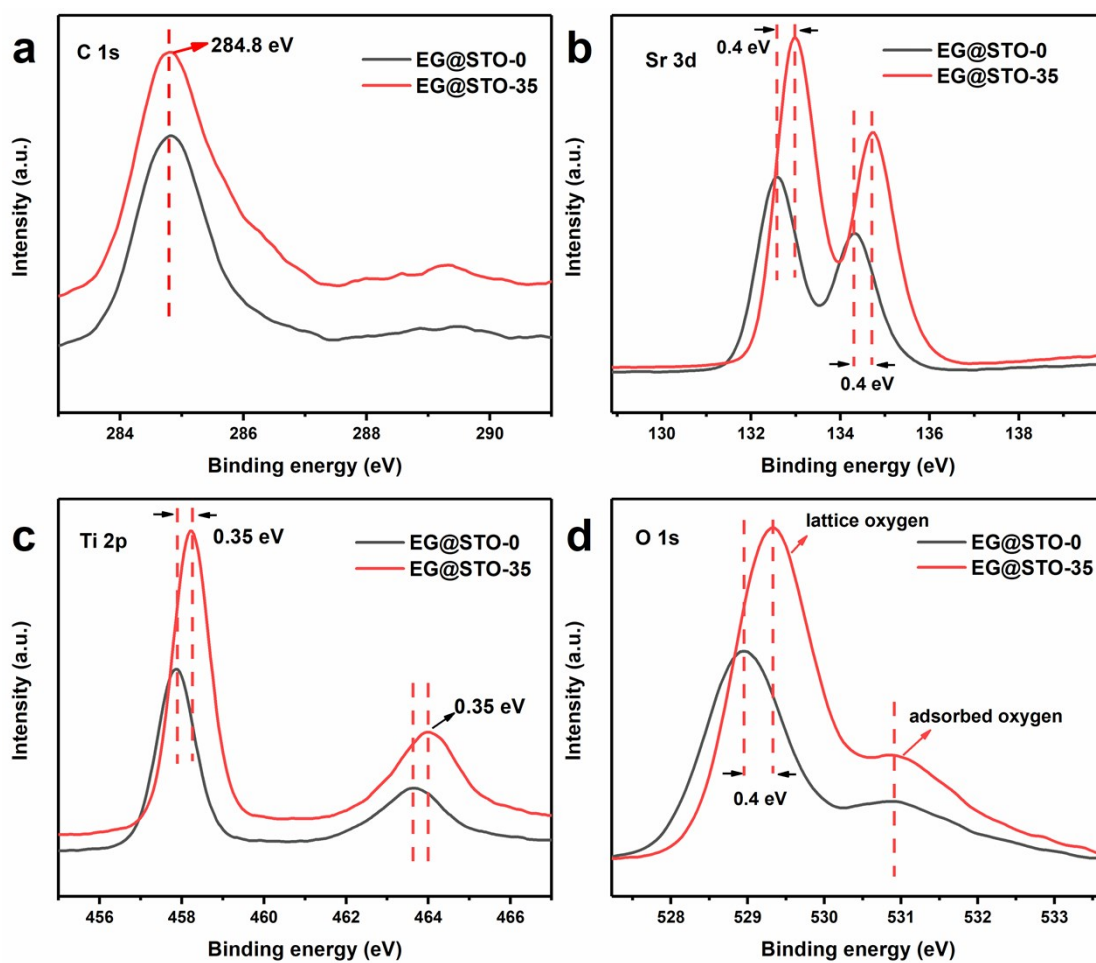

Figure S10. C 1s, Sr 3d, Ti 2d and O 1s XPS spectra of EG@STO-0 and EG@STO-

35.

Table S1. Electron density distribution changes of STO after coating with EG.

| Atom | Number | Charge (Surface with EG) | Charge (Surface without EG) |
|------|--------|--------------------------|-----------------------------|
| O    | 3      | -0.71                    | -0.74                       |
| O    | 6      | -0.71                    | -0.74                       |
| O    | 12     | -0.71                    | -0.74                       |
| O    | 15     | -0.71                    | -0.74                       |
| O    | 21     | -0.71                    | -0.74                       |
| O    | 24     | -0.71                    | -0.74                       |
| O    | 30     | -0.71                    | -0.74                       |
| O    | 33     | -0.71                    | -0.74                       |
| Ti   | 3      | 1.11                     | 1.09                        |
| Ti   | 6      | 1.11                     | 1.09                        |
| Ti   | 9      | 1.31                     | 1.09                        |
| Ti   | 12     | 1.11                     | 1.09                        |
